# Supplementary material
Source: PubMed Central journal article supplement (PMC6464110)

Supplementary figure: uncropped RNA blots (main-text figures)

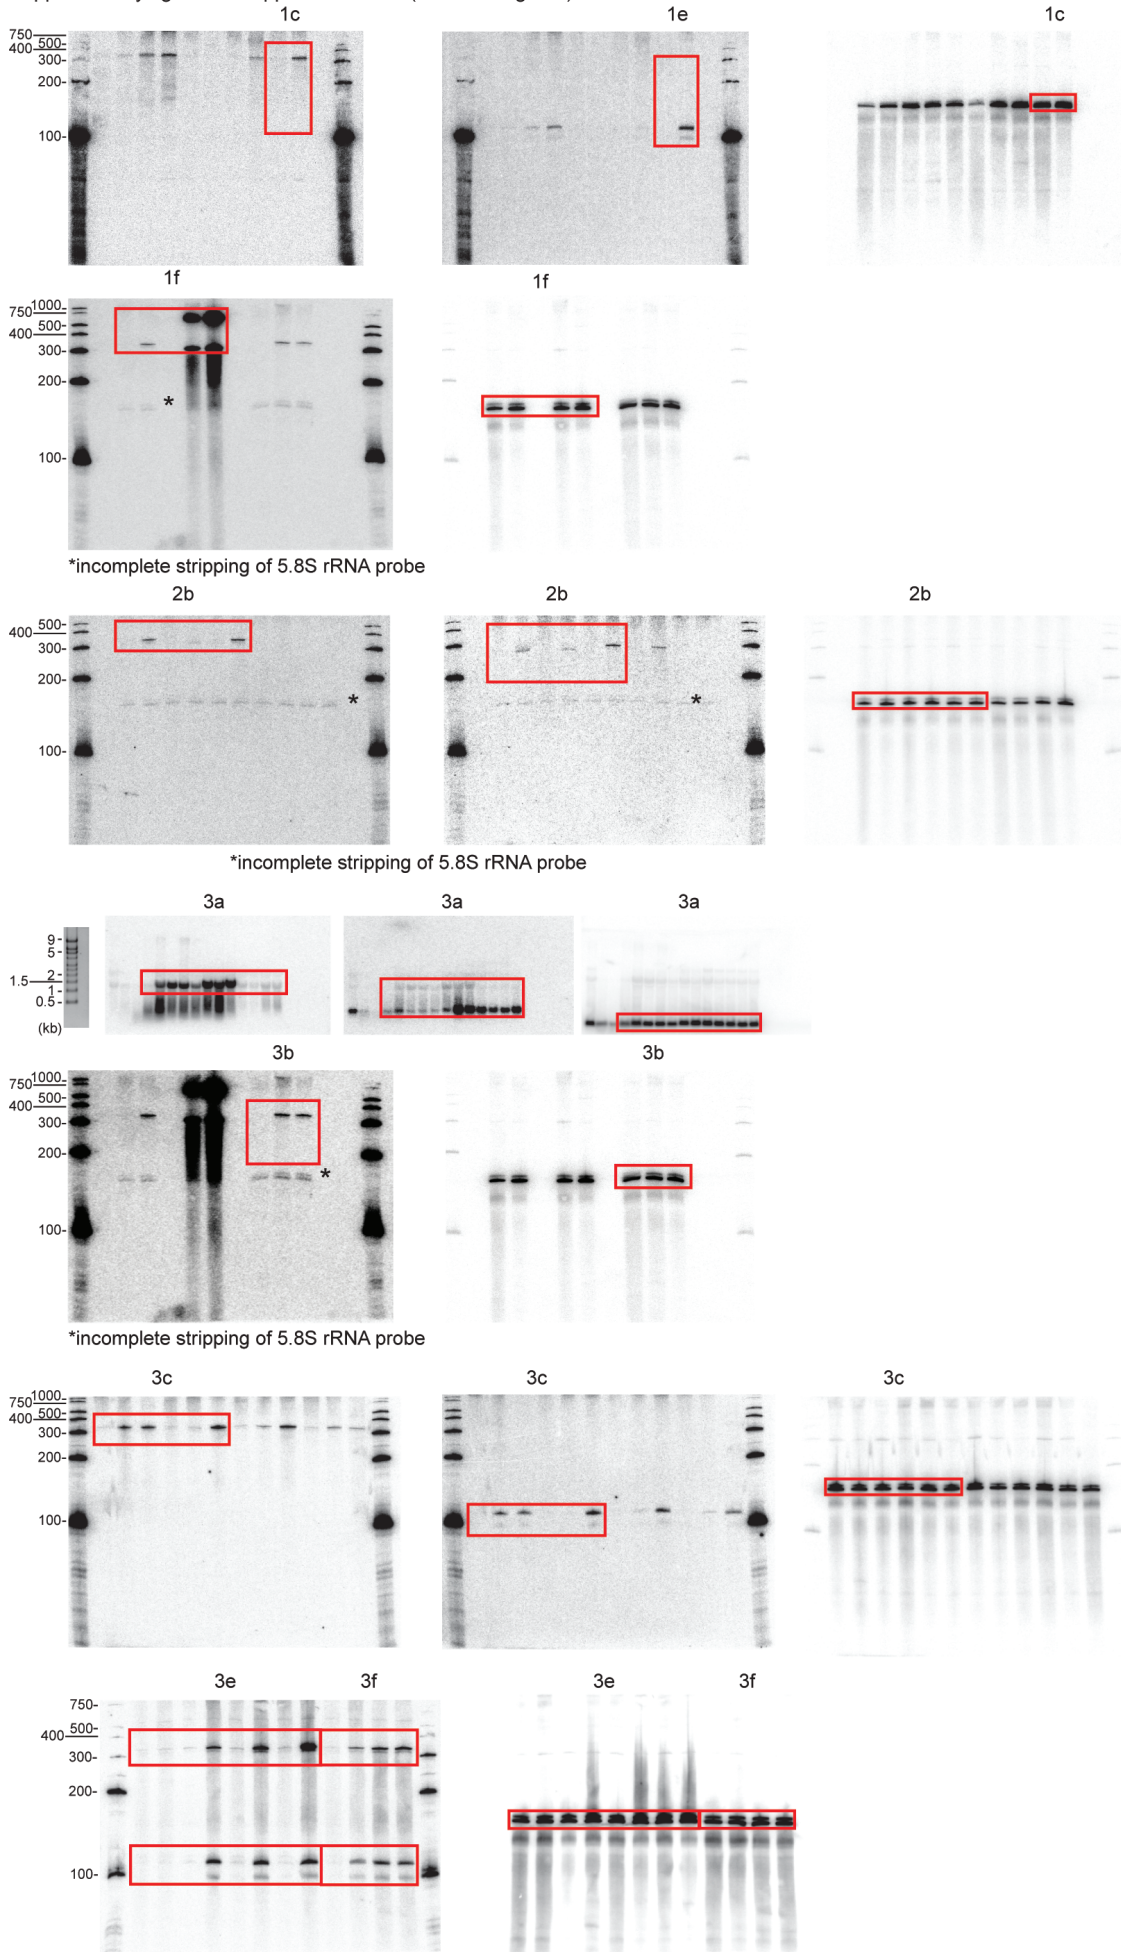

Supplementary figure: uncropped RNA blots (extended-data figures 2,5,7)

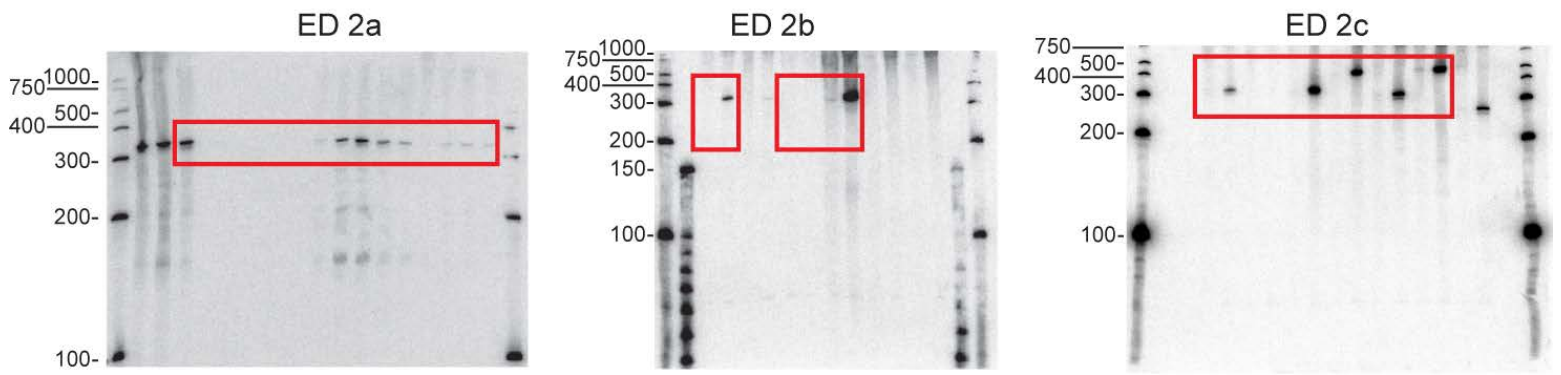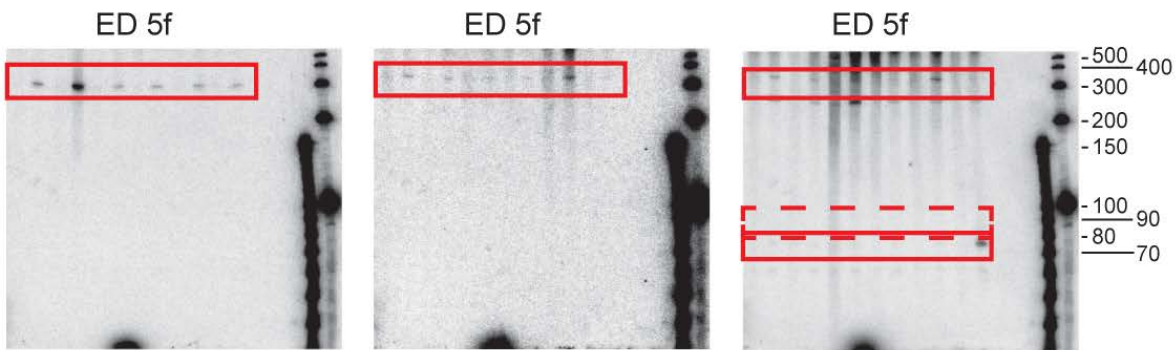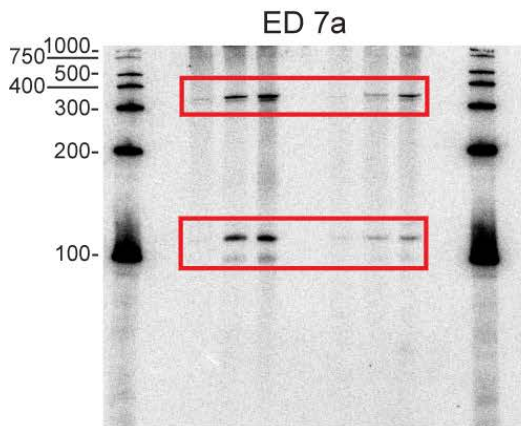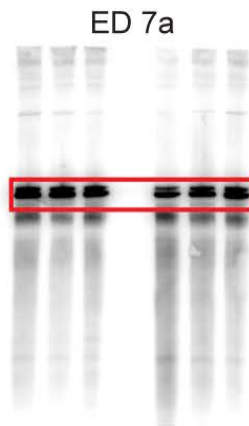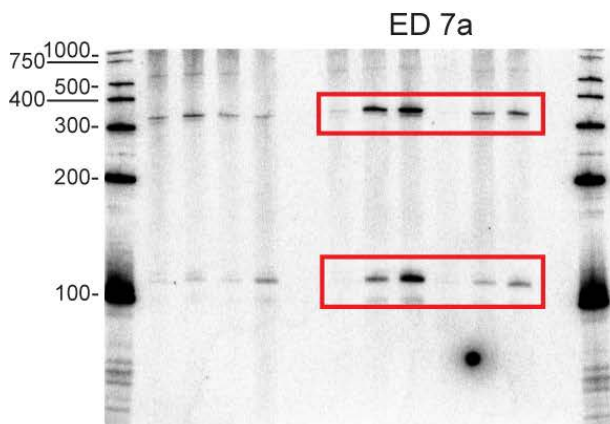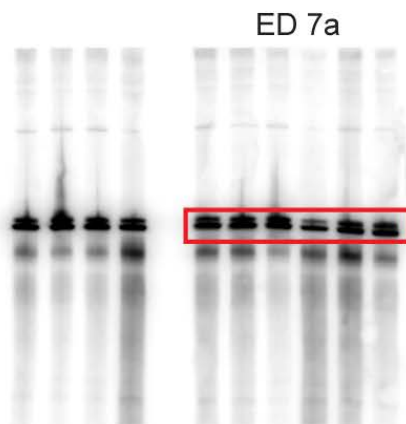



Supplementary figure: uncropped RNA blots (extended-data figure 6)

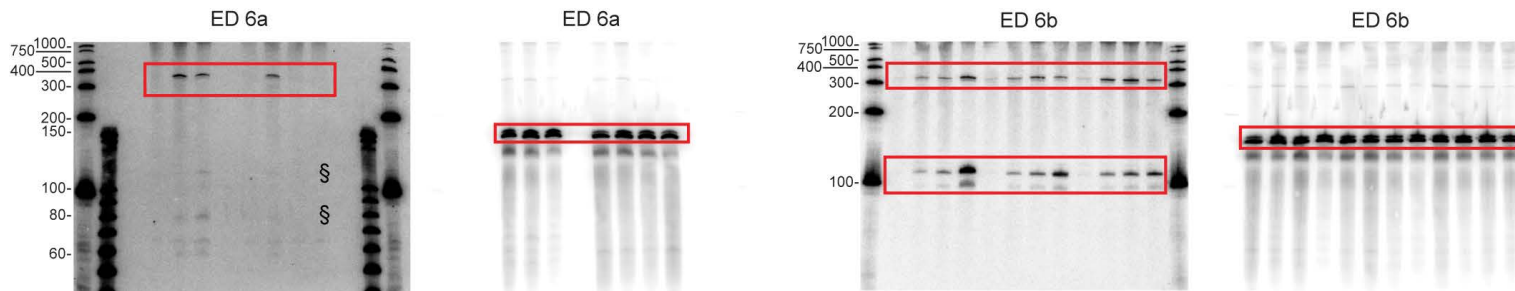

§insufficient specific activity  
on *SAC6*, *USV1* intron probes; blot was not re-probed.

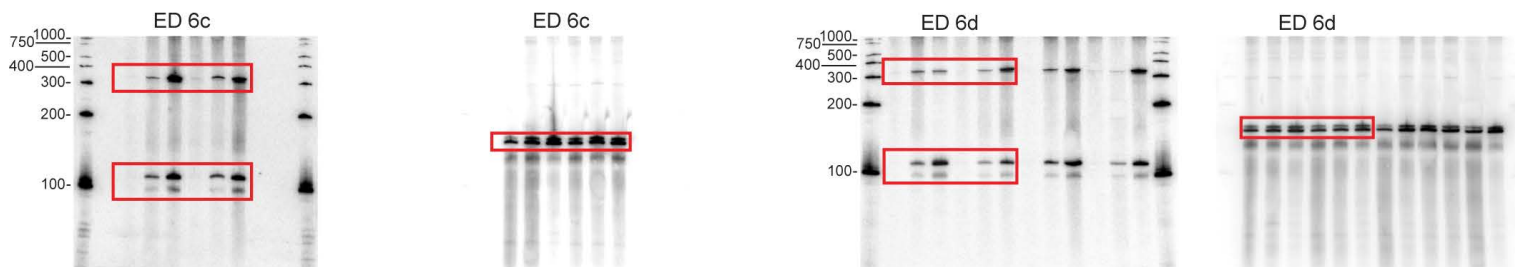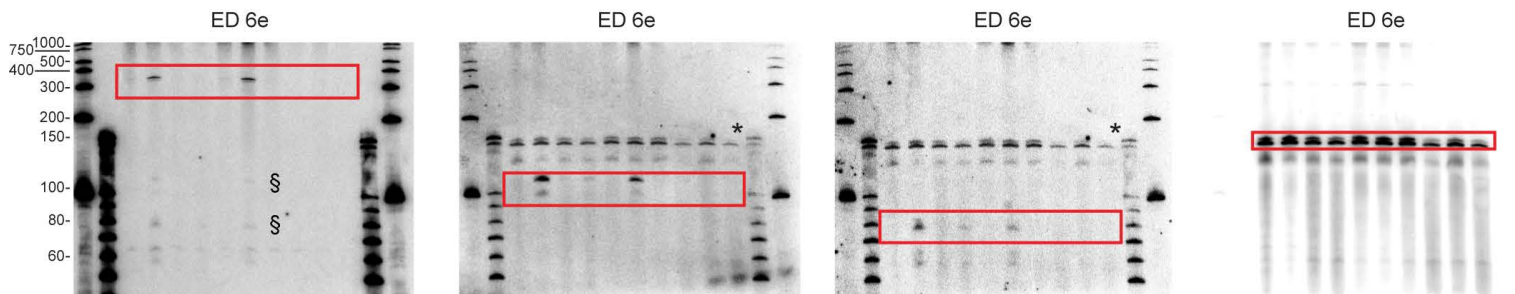

§insufficient specific activity  
on *SAC6*, *USV1* intron probes; re-probed (right).

\*incomplete stripping of 5.8S rRNA probe

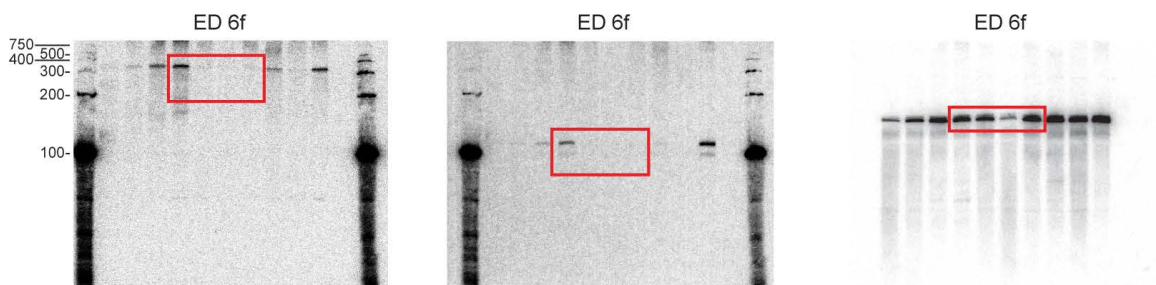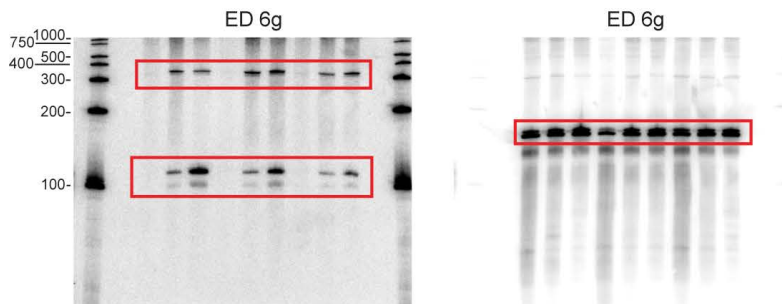

Supplement: NIHMS1009294-supplement-Source_Gel_Data.pdf [file NIHMS1009294-supplement-Source_Gel_Data.pdf]
